# Supplementary material for: Multifractal Cross Correlation Analysis of Agro-meteorological Datasets (Including Reference Evapotranspiration) of California, United States
Source: Preprints.org preprint supplement (doi:10.20944/preprints202010.0123.v1), 2020-10-06
Supplement: Supplementary file 1 [file supplementary]

Figure S1. Spectral density plots of different agro-meteorological time series of Bakersfield station: (a) reference evapotranspiration; (b) temperature; (c) wind speed; (d) solar radiation; (e) relative air humidity; and (f) air pressure.

Figure S2. Spectral density plots of different agro-meteorological time series of Santa Maria station: (a) reference evapotranspiration; (b) temperature; (c) wind speed; (d) solar radiation; (e) relative air humidity; and (f) air pressure.

Figure S3. Spectral density plots of different agro-meteorological time series of Los Angeles station: (a) reference evapotranspiration; (b) temperature; (c) wind speed; (d) solar radiation; (e) relative air humidity; and (f) air pressure.

Figure S4. Spectral density plots of different agro-meteorological time series of San Diego station: (a) reference evapotranspiration; (b) temperature; (c) wind speed; (d) solar radiation; (e) relative air humidity; and (f) air pressure.

Figure S5. GHE plots of original, shuffled and surrogate series of different agro-meteorological variables of Bakersfield station: (a) reference evapotranspiration; (b) temperature; (c) wind speed; (d) solar radiation; (e) relative air humidity; and (f) air pressure.

Figure S6. GHE plots of original, shuffled and surrogate series of different agro-meteorological variables of Santa Maria station: (a) reference evapotranspiration; (b) temperature; (c) wind speed; (d) solar radiation; (e) relative air humidity; and (f) air pressure.

Figure S7. GHE plots of original, shuffled and surrogate series of different agro-meteorological variables of Los Angeles station: (a) reference evapotranspiration; (b) temperature; (c) wind speed; (d) solar radiation; (e) relative air humidity; and (f) air pressure.

Figure S8. GHE plots of original, shuffled and surrogate series of different agro-meteorological variables of San Diego station: (a) reference evapotranspiration; (b) temperature; (c) wind speed; (d) solar radiation; (e) relative air humidity; and (f) air pressure.

Figure S9. GHE plots (upper panels), multifractal spectra (middle panels) and cross-correlation plots (lower panels) obtained by MFCCA of different links at Bakersfied station: (a) T-ET0; (b) U-ET0; (c) SR-ET0; (d) RH-ET0; (e) P-ET0.

Figure S10. GHE plots (upper panels), multifractal spectra (middle panels) and cross-correlation plots (lower panels) obtained by MFCCA of different links at Santa Maria station: (a) T-ET0; (b) U-ET0; (c) SR-ET0; (d) RH-ET0; (e) P-ET0.

Figure S11. GHE plots (upper panels), multifractal spectra (middle panels) and cross-correlation plots (lower panels) obtained by MFCCA of different links at Los Angeles station: (a) T-ET0; (b) U-ET0; (c) SR-ET0; (d) RH-ET0; (e) P-ET0.
